# Supplementary material
Source: HighWire-hosted journal article supplement (http://jpet.aspetjournals.org/highwire/filestream/136728/field_highwire_adjunct_files/0/236034_Supplemental_figure.pdf)

## Significant Improvement Of Antithrombotic Responses To Clopidogrel By Use Of A Novel Conjugate As Revealed In An Arterial Model Of Thrombosis

*Haoming Zhang, D. Adam Lauver, Hui Wang, Duxin Sun, Paul F. Hollenberg, Y. Eugene Chen,  
Yoichi Osawa, Daniel T. Eitzman*

Department of Pharmacology (HZ, DAL, PFH, YO) and Department of Internal Medicine (HW, YEC, DTE), The University of Michigan Medical School, and Department of Pharmaceutical Sciences (DS), College of Pharmacy, The University of Michigan, Ann Arbor, Michigan 48109

**Figure 1.** Determination of ex vivo inhibition of platelet aggregation by ClopNPT in the PRP of New Zealand white rabbits using light transmission aggregometry. The rabbits were given a 2 mg/kg IV bolus and the PRP was prepared at various time points following administration of ClopNPT. Platelet aggregation in the PRP was induced with 20  $\mu$ M ADP.

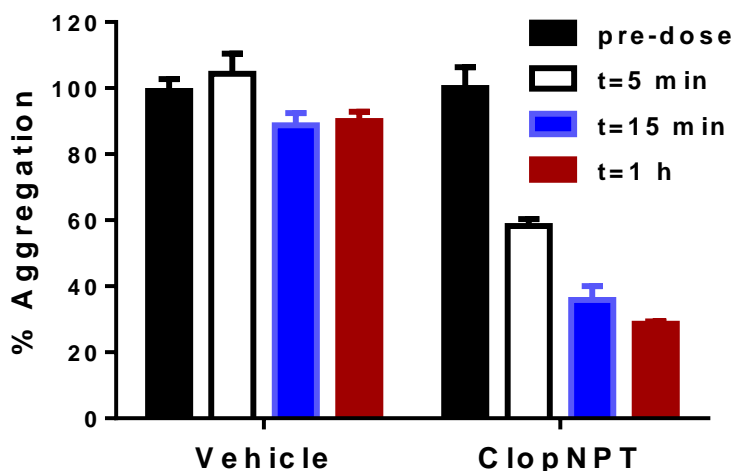

Supplement: 236034_Supplemental_figure.pdf [file 236034_Supplemental_figure.pdf]
